# Supplementary material for: The Antidiabetic Agent Metformin Inhibits IL-23 Production in Murine Bone-Marrow-Derived Dendritic Cells
Source: MDPI journal article supplement (doi:10.3390/jcm10235610), 2021-11-29
Supplement: s1 [file s1]

**Table S1.** Murine TaqMan gene expression assay probes.

| <b>Primer</b> | <b>Assay ID</b> |
|---------------|-----------------|
| Ywhaz         | Mm03950126-s1   |
| IL-23         | Mm00518984-m1   |
| Nfkbiz        | Mm00600522-m1   |
